# Supplementary material
Source: PubMed Central journal article supplement (PMC3773929)
Supplement: NIHMS497361-supplement-Supplementary_Figure_1.pdf [file NIHMS497361-supplement-Supplementary_Figure_1.pdf]

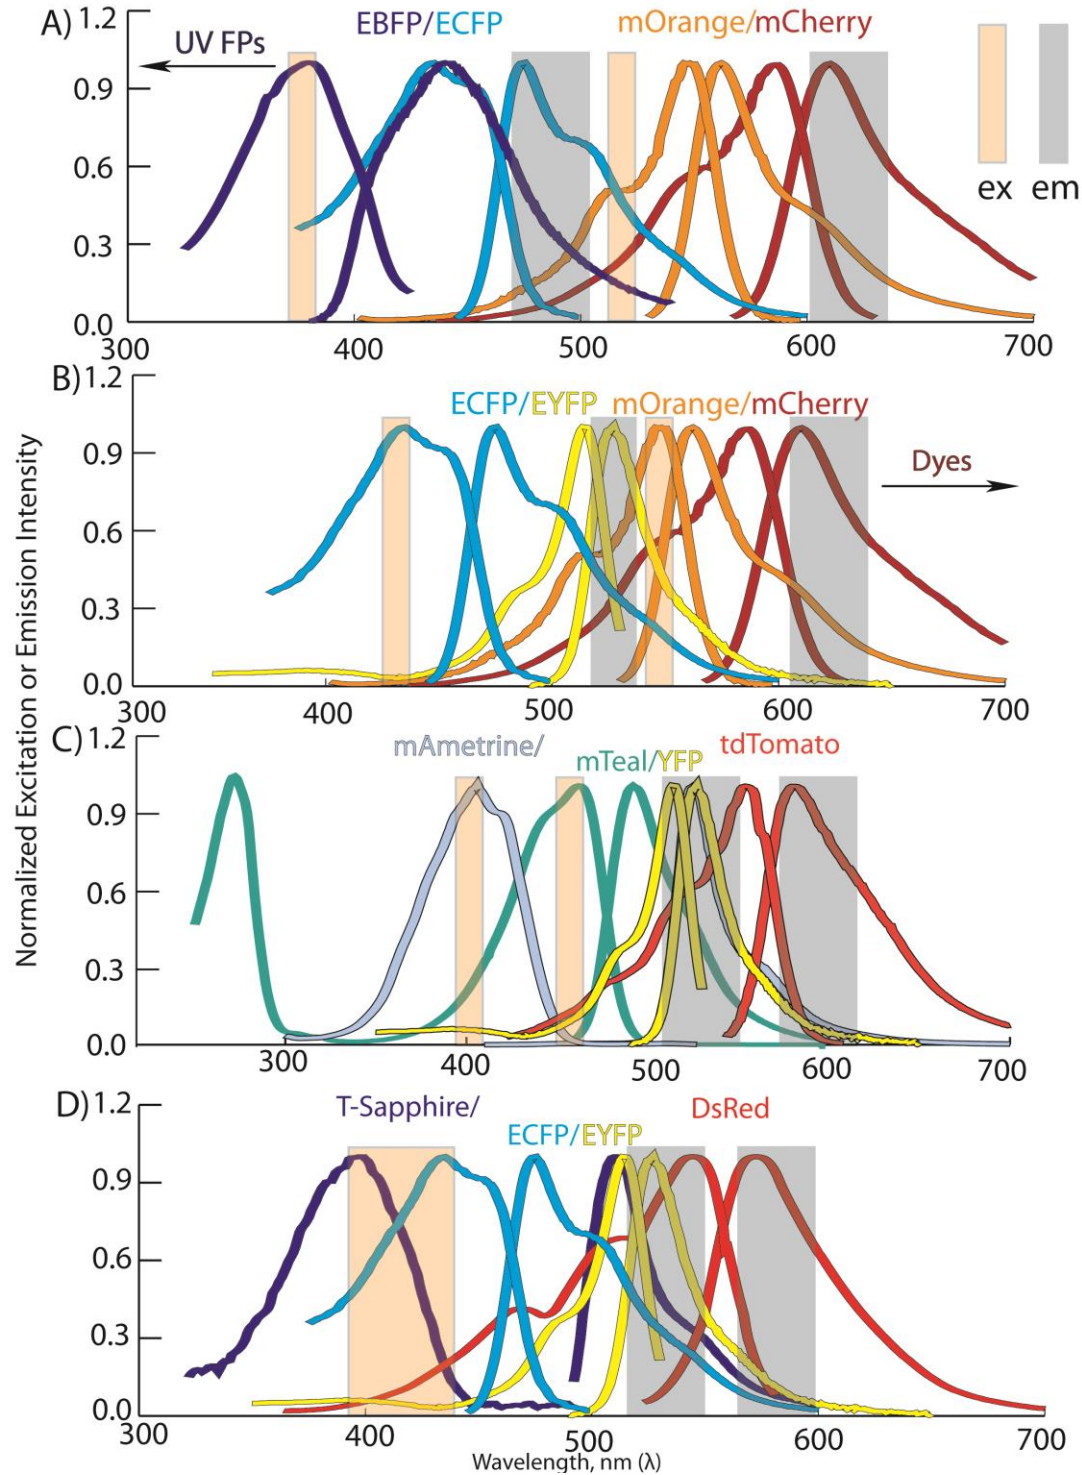

**Supplementary Figure 1. Spectra of fluorophores used in ratiometric FRET multiplex experiments.** A) EBFP/ECFP and mOrange/mCherry; B) ECFP/EYFP and mOrange2/mCherry; C) mAmetrine/tdTomato and mTeal/YFP; D) T-Sapphire/DsRed and ECFP/EYFP. The shaded boxes marked “ex” and “em” indicate suggested excitation and emission wavelengths. Spectral data adapted from sources described in McNamara et al.<sup>1</sup>
