# Supplementary material
Source: PubMed Central journal article supplement (PMC3773929)
Supplement: NIHMS497361-supplement-Supplementary_Table_1.pdf [file NIHMS497361-supplement-Supplementary_Table_1.pdf]

**Supplementary Table 1: FRET-based multiplexing studies**

| Reference | Fluorophores Used                                                                   | Methods Used for Imaging                                                                                          | Biological Insights                                                                                                                                 |
|-----------|-------------------------------------------------------------------------------------|-------------------------------------------------------------------------------------------------------------------|-----------------------------------------------------------------------------------------------------------------------------------------------------|
| 2-4       | CFP/YFP/mRFP1                                                                       | Experimental: Three-color, Ratiometric FRET x2 on same probe                                                      | Identification of trimeric molecular complexes; Analysis of caspase activities                                                                      |
| 5, 6      | CFP/DsRed with YFP/DsRed                                                            | Experimental: Intensity-based FRET x2                                                                             | Analysis of multiple caspase activities upon TNF $\alpha$ -induced cell death                                                                       |
| 7         | CFP/YFP                                                                             | Experimental: Spatial separation, Ratiometric FRET x2                                                             | Analysis of cAMP signaling in multiple cellular compartments simultaneously                                                                         |
| 8         | CFP/YFP                                                                             | Experimental: Ratiometric FRET x2 on same probe                                                                   | Simultaneous monitoring of PKA and PKC activities                                                                                                   |
| 9         | CFP/YFP, mOrange/mCherry, Fura Red                                                  | Experimental: Ratiometric FRET x2, Spatial separation, Ratiometric FRET x2 + Intensiometric FRET + Calcium Sensor | Relative timing relationships of CaMKII and PKC activation and Annexin A4 assembly in response to Ca <sup>2+</sup> stimulation                      |
| 10        | mTFP1/YFP, mAmetrine/tmTomato                                                       | Experimental: Ratiometric FRET x2                                                                                 | Dual caspase-3 sensors monitor delay between cytoplasmic and nuclear caspase-3 activity                                                             |
| 11        | Sirius/mseCFP, Sapphire/DsRed                                                       | Experimental: Ratiometric FRET x2                                                                                 | Relative timing of Ca <sup>2+</sup> signals and caspase-3 activity in response to TNF $\alpha$                                                      |
| 12        | mSapphire/RFP CFP/YFP                                                               | Experimental: Single wavelength excitation, Ratiometric FRET x2                                                   | Simultaneous imaging of cGMP and cAMP, or simultaneous imaging of Ca <sup>2+</sup> and cAMP in contracting cardiomyocytes                           |
| 13, 14    | CFP/YFP, Dyes: Mero87/Alexa750 pair                                                 | Experimental and Computational: Ratiometric FRET + Ratiometric dye change                                         | Relative timing and position of Cdc42, Rac1, and RhoA during cellular protrusion                                                                    |
| 15        | mTagBFP/sREACH, CFP/YFP, Fura Red                                                   | Experimental: Ratiometric FRET x2 + Ca <sup>2+</sup>                                                              | Simultaneous imaging of cGMP, cAMP, and Ca <sup>2+</sup> using spectrally separable probes                                                          |
| 16        | CFP/YFP, mOrange2/mCherry                                                           | Experimental: Ratiometric FRET x2                                                                                 | Simultaneous analysis of the relative timing of Src and MMP-MT1 activities in response to EGF stimulation                                           |
| 17        | FLIM: CFP/tHcRed and YFP/tHcRed                                                     | Experimental: FLIM FRET                                                                                           | Simultaneous analysis of K-ras and H-ras activities in different cellular compartments in response to EGF stimulation using a common binding domain |
| 18        | CFP/YFP and FLIM: mTagRFP/mPlum                                                     | Experimental: Ratiometric FRET + FLIM FRET                                                                        | Simultaneous imaging of Ca <sup>2+</sup> signals and H-ras activity in response to EGF stimulation                                                  |
| 19        | FLIM: mRFP/GFP, mStrawberry/GFP, mRFP/Venus, mStrawberry/Venus, and mDarkVenus/mGFP | Experimental: FLIM FRET                                                                                           | Analysis of CaMKII activity in neuronal synapses and evaluation of a variety of FLIM fluorescent protein pairs with potential for multiplex imaging |

1. McNamara, G., Gupta, A., Reynaert, J., Coates, T.D. & Boswell, C. Spectral imaging microscopy web sites and data. *Cytometry A* **69**, 863-71 (2006).
2. Galperin, E., Verkhusha, V.V. & Sorkin, A. Three-chromophore FRET microscopy to analyze multiprotein interactions in living cells. *Nat Methods* **1**, 209-17 (2004).
3. He, L., Wu, X., Simone, J., Hewgill, D. & Lipsky, P.E. Determination of tumor necrosis factor receptor-associated factor trimerization in living cells by CFP->YFP->mRFP FRET detected by flow cytometry. *Nucleic Acids Res* **33**, e61 (2005).
4. Wu, X. et al. Measurement of two caspase activities simultaneously in living cells by a novel dual FRET fluorescent indicator probe. *Cytometry A* **69**, 477-86 (2006).
5. Kawai, H. et al. Simultaneous imaging of initiator/effector caspase activity and mitochondrial membrane potential during cell death in living HeLa cells. *Biochim Biophys Acta* **1693**, 101-10 (2004).
6. Kawai, H. et al. Simultaneous real-time detection of initiator- and effector-caspase activation by double fluorescence resonance energy transfer analysis. *J Pharmacol Sci* **97**, 361-8 (2005).
7. DiPilato, L.M., Cheng, X. & Zhang, J. Fluorescent indicators of cAMP and Epac activation reveal differential dynamics of cAMP signaling within discrete subcellular compartments. *Proc Natl Acad Sci U S A* **101**, 16513-8 (2004).
8. Brumbaugh, J., Schleifenbaum, A., Gasch, A., Sattler, M. & Schultz, C. A dual parameter FRET probe for measuring PKC and PKA activity in living cells. *J Am Chem Soc* **128**, 24-5 (2006).
9. Piljic, A. & Schultz, C. Simultaneous recording of multiple cellular events by FRET. *ACS Chem Biol* **3**, 156-60 (2008).
10. Ai, H.W., Hazelwood, K.L., Davidson, M.W. & Campbell, R.E. Fluorescent protein FRET pairs for ratiometric imaging of dual biosensors. *Nat Methods* **5**, 401-3 (2008).
11. Tomosugi, W. et al. An ultramarine fluorescent protein with increased photostability and pH insensitivity. *Nat Methods* **6**, 351-3 (2009).
12. Niino, Y., Hotta, K. & Oka, K. Simultaneous live cell imaging using dual FRET sensors with a single excitation light. *PLoS One* **4**, e6036 (2009).
13. Tsukada, Y. et al. Quantification of local morphodynamics and local GTPase activity by edge evolution tracking. *PLoS Comput Biol* **4**, e1000223 (2008).
14. Machacek, M. et al. Coordination of Rho GTPase activities during cell protrusion. *Nature* **461**, 99-103 (2009).
15. Niino, Y., Hotta, K. & Oka, K. Blue fluorescent cGMP sensor for multiparameter fluorescence imaging. *PLoS One* **5**, e9164 (2010).
16. Ouyang, M. et al. Simultaneous visualization of protumorigenic Src and MT1-MMP activities with fluorescence resonance energy transfer. *Cancer Res* **70**, 2204-12 (2010).
17. Peyker, A., Rocks, O. & Bastiaens, P.I. Imaging activation of two Ras isoforms simultaneously in a single cell. *Chembiochem* **6**, 78-85 (2005).
18. Grant, D.M. et al. Multiplexed FRET to image multiple signaling events in live cells. *Biophys J* **95**, L69-71 (2008).
19. Kwok, S. et al. Genetically encoded probe for fluorescence lifetime imaging of CaMKII activity. *Biochem Biophys Res Commun* **369**, 519-25 (2008).
